# Supplementary material for: Assessing the prognostic factors, survival, and recurrence incidence of triple negative breast cancer patients, a single center study in Iran
Source: PLoS One. 2019 Jan 4;14(1):e0208701. doi: 10.1371/journal.pone.0208701 (PMC6319722; doi:10.1371/journal.pone.0208701)
Supplement: S1 Database — Days to the last visit, to the recurrence date and to the death time was estimated which can be helpful to calculate OS and DFS. The patients marked with yellow color were omitted from the survival study. (XLSX) [file pone.0208701.s001.xlsx]

## Sheet: Database
No	Days to Last Visit	Days to Recurrence	Days to Death	Age at First Visit (year)	sex	side	Diagnosis	ER	PR	HER2	P53	Ki67 (%)	BRCA	perineural	vascular	margin	Node	Size (cm)	Mets in Diagnosis	N	M	Type of Surgery	Radiotherapy	Organ of Recurrence	Chemo Cat
1	2504			43	female	right	ILC	negative	negative	negative				positive	positive	negative	positive	4	negative	1	0	MRM	yes		3
2	2936			51	female	left	IDC/DCIS	negative	negative	negative				negative	negative	negative	negative	3	negative	0	0	MRM	no		3
3	2821			27	female	right	IDC	negative	negative	negative	negative			negative	negative	negative	negative	1.5	negative	0	0		no		1
4	2771			42	female	right	IDC	negative	negative	negative	positive						negative	3.5	negative	0	0	MRM			1
5	1253			47	female	right	IDC	negative	negative	negative	positive	45			negative	negative	negative	3	negative	0	0		no		1
6	241			46	female	right	DCIS	negative	negative	negative	positive	30		negative	negative	negative	negative	2	negative	0	0	MRM	no
7	2645	1687		61	female	right	IDC	negative	negative	negative				negative	negative	negative	negative	3	negative	0	0	MRM	no	Local, Lung	1
8	2487			58	female	left	IDC	negative	negative	negative	positive				positive	negative	positive	2.7	negative	1	0	BCT	yes		1
9	2333	1352		29	female	left	IDC	negative	negative	negative			positive (1&2)		positive		negative	2.5	negative	0	0			Bone, Liver, Lung	1
10	211			41	female	left	IDC	negative	negative	negative	positive	35		negative	negative	negative	positive	1.5	negative	1	0	BCT	yes		1
11	338	303	862	80	female	left	IDC	negative	negative	negative				negative			positive	6	negative	1	0	MRM	yes	Local	3
12	637	200	418	53	female	left	IDC	negative	negative	negative						negative	positive	3	negative	1	0	MRM	no	bone	1
13	2482	1976	650	45	female	right	IDC	negative	negative	negative	negative					negative	positive	3	negative	1	0	MRM	yes	Carcinoid of Lung, Liver	2
14	214		2493	35	female	left	IDC/DCIS	negative	negative	negative				negative	positive	negative	positive	3	negative	1	0	MRM			2
15	1715			32	female	right	IDC	negative	negative	negative					negative				negative		0	MRM	yes		1
16	984	613		37	female	right	IDC	negative	negative	negative	positive						positive	4	negative	1	0	MRM	yes	Local	3
17	416	355		40	female	left	IDC	negative	negative	negative	positive		negative		positive	positive		1.8	negative		0	BCT	no	Local	2
18	1426	1284	3318	51	female	right	IDC	negative	negative	negative				negative	negative		positive	2	negative	1	0	MRM	yes	Lung, Brain, Bone	1
19	2063	1256	1448	42	female	left	IDC	negative	negative	negative	positive			negative	positive	negative	positive		negative	1	0	MRM	yes	Bone	1
20	365	511	2111	34	female	right	IDC	negative	negative	negative	negative				negative			2.5	negative		0	MRM	yes	Local	1
21	3192			59	female	right	IDC	negative	negative	negative	positive					negative	negative		negative	0	0	MRM			3
22	266	242		31	female	right	IDC	negative	negative	negative	negative	20		negative	negative	negative	positive	3	negative	1	0	BCT	yes	Local	3
23	3688			31	female	right	IDC	negative	negative	negative	negative			negative	negative	negative	positive	3	negative	1	0	MRM	no		3
24	1093	-44		41	female	left	IDC	negative	negative	negative	negative						positive	2.5	negative	1	0	MRM	yes	Thyroid	1
25	3877			51	female	left	IDC	negative	negative	negative				negative	negative	negative	negative	1.7	negative	0	0	MRM	yes		3
26	2898			42	female	left	IDC	negative	negative	negative					positive	positive	negative	2.5	negative	0	0	MRM	no		3
27	2430			48	female	right	IDC	negative	negative	negative	positive						negative	2.5	negative	0	0	BCT	no		3
28	629	405		44	female	right	IDC	negative	negative	negative	positive						negative	5	negative	0	0	MRM	no	Liver	3
29	3775			68	female	left	IDC	negative	negative	negative	negative	negative		negative	negative	negative	negative	2.5	negative	0	0	MRM			3
30	4005			49	female	left	IDC	negative	negative	negative	positive			negative	negative	negative	positive	2	negative	1	0	MRM	no		3
31	1272			63	female	left	IDC	negative	negative	negative	positive	10		negative	positive		negative	2.5	negative	0	0	MRM	yes		3
32	1571			30	female	left	IDC	negative	negative	negative	negative	5			negative	negative	positive	3.5	negative	1	0	MRM	yes		1
33	351			50	female	left	IDC	negative	negative	negative	positive						negative	7	negative	0	0	MRM	yes		1
34	215			41	female	left	IDC	negative	negative	negative	positive				positive		negative	4	negative	0	0	MRM	yes		1
35	3903			46	female	left	IDC	negative	negative	negative	negative			negative	negative	positive	negative	1.5	negative	0	0	MRM			3
36	3749			46	female	left	IDC	negative	negative	negative	negative			positive		negative	positive	4	negative	1	0	MRM	yes		1
37	409			43	female	left	IDC	negative	negative	negative	negative			negative	negative		positive	3.5	negative	1	0	BCT			3
38	1995			54	female	right	IDC	negative	negative	negative	negative	30				negative	negative		negative	0	0	MRM	no		1
39	4335			39	female	left	IDC	negative	negative	negative				negative	negative	negative	negative	4.5	negative	0	0	MRM	yes		3
40	560			52	female	right	IDC	negative	negative	negative	positive			negative	positive		negative	6	negative	0	0	MRM	yes		1
41	4538			52	female	right	IDC	negative	negative	negative	positive					negative	negative	4	negative	0	0	MRM			1
42	4727			37	female	right	IDC	negative	negative	negative				negative	negative			1.5	negative		0	BCT			1
43	1205			40	female	right	IDC	negative	negative	negative		90		negative	negative	negative	negative	2.5	negative	0	0	BCT	yes		1
44	0		297	54	female	left	IDC	negative	negative	negative		18				negative	positive	3.5	negative	1	0	MRM			1
45	84		99	63	female	right	IDC	negative	negative	negative				negative	negative				negative		0	refer			1
46	1157			59	female	left	IDC	negative	negative	negative						negative	positive	5.5	negative	1	0	MRM	yes		1
47	1458	1084		62	female	right	IDC	negative	negative	negative		50				negative	positive	2	negative	1	0	MRM	yes	Lung	1
48	1582			59	female	left	IDC	negative	negative	negative						negative	negative	4	negative	0	0	MRM	no		1
49	2326			49	female	left	IDC	negative	negative	negative		35		negative	positive	negative	negative	1.5	negative	0	0	BCT	yes		1
50	1269			60	female	left	IDC	negative	negative	negative	positive	5		negative	negative		negative	4	negative	0	0	MRM	no		1
51	739	649		52	female	left	IDC	negative	negative	negative	positive			positive	positive	negative	positive	9	negative	1	0	MRM	yes	LAP	1
52	30	289	553	28	female	left	IDC	negative	negative	negative		35					positive		negative	1	0	MRM	yes	LAP, Bone	1
53	699			50	female	left	IDC	negative	negative	negative	positive	80		negative	negative		positive	11	negative	1	0	MRM	yes		1
54	763			48	female	left	DCIS	negative	negative	negative		15		positive	positive		negative	2.5	negative	0	0	BCT	yes		1
55	959			26	female	left	IDC	negative	negative	negative		60		negative	negative	negative	positive		negative	1	0	MRM	yes		1
56	958			28	female	left	IDC	negative	negative	negative		20					negative	2.5	negative	0	0	BCT	yes		1
57	596			31	female	left	DCIS	negative	negative	negative	negative								negative			MRM	yes	Lung	1

## Sheet: Chemo Cat
Chemo Cat	Regimen
1	AC-T or EC-T
2	TAC
3	5FU based Chemo
